# Supplementary material for: How do tobacco control policies work in low-income and middle-income countries? A realist synthesis
Source: PubMed Central journal article supplement (PMC9644319; doi:10.1136/bmjgh-2022-008859), 2022-11-08
Supplement: bmjgh-2022-008859supp002.pdf [file bmjgh-2022-008859supp002.pdf]

09/05/2022, 14:51

Print Search History: EBSCOhost

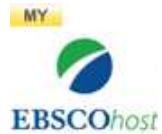

Monday, May 09, 2022 9:21:06 AM

| #  | Query                                                                                                                                                                                                                                                                                                                                                                                                                                                                                                                                                                                                                                                                                                                                                                                                                                                 | Limiters/Expanders                                                     | Last Run Via                                                                                                                                                                                                                                                                                                                                            | Results |
|----|-------------------------------------------------------------------------------------------------------------------------------------------------------------------------------------------------------------------------------------------------------------------------------------------------------------------------------------------------------------------------------------------------------------------------------------------------------------------------------------------------------------------------------------------------------------------------------------------------------------------------------------------------------------------------------------------------------------------------------------------------------------------------------------------------------------------------------------------------------|------------------------------------------------------------------------|---------------------------------------------------------------------------------------------------------------------------------------------------------------------------------------------------------------------------------------------------------------------------------------------------------------------------------------------------------|---------|
| S1 | (tobacco) AND (polic* OR law OR act OR statut* OR regulat* OR ban* OR restrict*) AND (implement* OR enforce* OR compliance* OR adher*) AND (Afghanistan OR Albania OR Algeria OR American Samoa OR Angola OR Argentina OR Armenia OR Azerbaijan OR Bangladesh OR Belarus OR Belize OR Benin OR Bhutan OR Bolivia OR "Bosnia and Herzegovina" OR Botswana OR Brazil OR Bulgaria OR Burkina Faso OR Burundi OR "Cabo Verde" OR Cambodia OR Cameroon OR "Central African Republic" OR Chad OR China OR Colombia OR Comoros OR "Congo" OR "Costa Rica" OR "Cote d'Ivoire" OR Cuba OR Djibouti OR Dominica OR "Dominican Republic" OR Ecuador OR Egypt OR "El Salvador" OR "Guinea" OR Eritrea OR Eswatini OR Ethiopia OR Fiji OR Gabon OR Gambia OR Georgia OR Ghana OR Grenada OR Guatemala OR Guinea OR Guinea-Bissau OR Guyana OR Haiti OR Honduras OR | Expanders - Apply equivalent subjects<br>Search modes - Boolean/Phrase | Interface - EBSCOhost Research Databases<br>Search Screen - Advanced Search<br>Database - CINAHL;EconLit;ERIC;Library, Information Science & Technology Abstracts;APA PsycArticles;APA PsycInfo;SocINDEX;MEDLINE;APA PsycBooks;eBook Collection (EBSCOhost);OpenDissertations;eBook Academic Collection (EBSCOhost);Health and Psychosocial Instruments | 3,393   |

<https://web.s.ebscohost.com/ehost/searchhistory/PrintSearchHistory?vid=3&sid=000bfc4a-6370-4ed5-9cb5-b2492ba0413f%40redis&bdata=JmRiPWVjbiZkYj1lcm1jJmRiPWx4aCZkYj1wZGgmZGI9cHN5aCZkYj1zbnm...> 1/3

09/05/2022, 14:51

Print Search History: EBSCOhost

India OR Indonesia OR Iran OR Iraq  
OR Jamaica OR Jordan OR  
Kazakhstan OR Kenya OR Kiribati OR  
Korea OR Kosovo OR “Kyrgyz  
Republic” OR “Lao PDR” OR Lebanon  
OR Lesotho OR Liberia OR Libya OR  
Madagascar OR Malawi OR Malaysia  
OR Maldives OR Mali OR “Marshall  
Islands” OR Mauritania OR Mauritius  
OR Mexico OR “Micronesia” OR  
Moldova OR Mongolia OR  
Montenegro OR Morocco OR  
Mozambique OR Myanmar OR  
Namibia OR Nepal OR Nicaragua OR  
Niger OR Nigeria OR “North  
Macedonia” OR Pakistan OR Panama  
OR “Papua New Guinea” OR  
Paraguay OR Peru OR Philippines  
OR Romania OR “Russian  
Federation” OR Rwanda OR “Samoa  
Sao Tome and Principe” OR Senegal  
OR Serbia OR “Sierra Leone” OR  
“Solomon Islands” OR Somalia OR  
“South Africa” OR “South Sudan” OR  
“Sri Lanka” OR “St. Lucia” OR “St.  
Vincent and the Grenadines” OR  
Sudan OR Suriname OR “Syrian Arab  
Republic” OR Tajikistan OR Tanzania  
OR Thailand OR Timor-Leste OR  
Togo OR Tonga OR Tunisia OR  
Turkey OR Turkmenistan OR Tuvalu  
OR Uganda OR Ukraine OR

<https://web.s.ebscohost.com/ehost/searchhistory/PrintSearchHistory?vid=3&sid=000bfc4a-6370-4ed5-9cb5-b2492ba0413f%40redis&bdata=JmRiPWVjbiZkYj1lcm1jJmRiPWx4aCZkYj1wZGgmZGI9cHN5aCZkYj1zbnm...> 2/3

09/05/2022, 14:51

Print Search History: EBSCOhost

Uzbekistan OR Vanuatu OR Vietnam  
OR "West Bank and Gaza" OR Yemen  
OR Zambia OR Zimbabwe OR "low  
and middle income countries" OR "low  
income countries" OR "middle income  
countries")
