# Supplementary material for: How do tobacco control policies work in low-income and middle-income countries? A realist synthesis
Source: PubMed Central journal article supplement (PMC9644319; doi:10.1136/bmjgh-2022-008859), 2022-11-08
Supplement: bmjgh-2022-008859supp003.pdf [file bmjgh-2022-008859supp003.pdf]

**Article title: How do Tobacco Control Policies Work? Facilitators of and Barriers to Implementing Tobacco Control Policies in Low- And Middle-Income Countries: A Realist Synthesis**

**Journal name: BMJ Global Health**

**Authors' information: Pragati B Hebbar\*, Vivek Dsouza, Upendra Bhojani, Prashanth Nuggehalli Srinivas, Onno C P van Schayck, Giridhara R Babu, Gera E Nagelhout.**

**1. Institute of Public Health, Bengaluru and Department of Health Promotion, Maastricht University (CAPHRI) [pragati@iphindia.org](mailto:pragati@iphindia.org)**

**2. Institute of Public Health, Bengaluru.**

**3. Institute of Public Health, Bengaluru.**

**4. Institute of Public Health, Bengaluru.**

**5. Department of Family Medicine, Maastricht University (CAPHRI)**

**6. Indian Institute of Public Health, Public Health Foundation of India (PHFI)**

**7. Department of Health Promotion, Maastricht University (CAPHRI)**

**Supplementary file 3: Article characteristics of studies reviewed**

| <b>First author (last names) and year of publication</b> | <b>Type of publication</b> | <b>Location of study</b>     | <b>Contextual elements explained in the article</b> | <b>Strategy discussed in the article</b> |
|----------------------------------------------------------|----------------------------|------------------------------|-----------------------------------------------------|------------------------------------------|
| Abu-Rmeileh et al 2022                                   | Review                     | Eastern Mediterranean region | Macro, meso                                         | Awareness                                |
| Banks C et al 2017                                       | Review                     | Egypt and Iran               | Macro, meso                                         | Tobacco industry interference            |
| Bhatta ND et al 2020                                     | Original research          | Nepal                        | Macro, meso                                         | Tobacco industry interference            |
| Borges et al 2020                                        | Review                     | Brazil                       | Macro                                               | Tobacco industry interference            |

|                      |                   |              |             |                                                           |
|----------------------|-------------------|--------------|-------------|-----------------------------------------------------------|
| Bump et al 2013      | Review            | LMIC         | Macro       | Tobacco industry interference, intersectoral coordination |
| Byron et al 2019     | Review            | LMIC         | Macro       | Tobacco industry interference, intersectoral coordination |
| Carroll et al 2016   | Review            | Global       | Macro, meso | Awareness, tobacco industry interference                  |
| Chugh A et al 2020   | Review            | India        | Macro, meso | Tobacco industry interference                             |
| Craig et al 2019     | Original research | 12 countries | Macro, meso | awareness, tobacco industry interference                  |
| Crosbie E et al 2011 | Original research | Mexico       | Meso, micro | Awareness, enforcement                                    |
| Egbe et al 2019      | Review            | Nigeria      | Meso        | Tobacco industry interference, awareness, enforcement     |
| Elsley et al 2016    | Original research | Nepal        | Macro       | awareness, review system                                  |
| Ghose et al 2019     | Original research | India        | Macro, meso | awareness                                                 |
| Hebbar et al 2017    | Original research | India        | Macro, meso | Intersectoral coordination, review system                 |
| Hiilamo et al 2015   | Short report      | LMIC         | Macro       | Tobacco industry interference                             |
| Hirpa S et al 2022   | Original research | Ethiopia     | Meso, micro | Tobacco industry interference, awareness,                 |

|                           |                     |                 |             |                                                                      |
|---------------------------|---------------------|-----------------|-------------|----------------------------------------------------------------------|
|                           |                     |                 |             | intersectoral coordination                                           |
| Huque et al 2017          | Review              | Bangladesh      | Macro, meso | Enforcement, awareness                                               |
| Jackson-Morris et al 2015 | Original research   | Bangladesh      | Macro, meso | awareness, intersectoral coordination, review system                 |
| Jagdish et al 2012        | Short communication | India           | Macro, meso | awareness                                                            |
| Jallow et al 2019         | Original research   | The Gambia      | Macro       | awareness                                                            |
| Kashiwabara et al 2011    | Review              | India           | Macro, meso | awareness, review system, tobacco industry interference              |
| Khan et al 2014           | Brief report        | South Asia      | Macro       | Enforcement, awareness                                               |
| Kumar P et al 2022        | Original research   | India           | Macro, meso | Tobacco industry interference, awareness, intersectoral coordination |
| Lencucha et al 2016       | Original research   | Zambia          | Macro, meso | intersectoral coordination                                           |
| Lencucha et al 2016       | Original research   | Kenya           | Micro, meso | intersectoral coordination                                           |
| Martin et al 2013         | Original research   | Pacific islands | Micro, meso | Enforcement, awareness, intersectoral coordination                   |
| McCool et al 2013         | Original research   | Pacific islands | Macro, meso | awareness, tobacco industry interference                             |

|                       |                     |         |                    |                                                           |
|-----------------------|---------------------|---------|--------------------|-----------------------------------------------------------|
| Menon 2018            | Original research   | India   | Micro, meso        | Intersectoral coordination                                |
| Mohamed et al 2018    | Original research   | Kenya   | Micro, meso, macro | Tobacco industry interference, intersectoral coordination |
| Mohan et al 2013      | Short communication | India   | Micro, meso        | Intersectoral coordination, enforcement                   |
| Nagler et al 2013     | Review              | Global  | Macro              | Tobacco industry interference, enforcement, review system |
| Oladele et al 2013    | Original research   | Nigeria | Macro              | awareness, tobacco industry interference                  |
| Oswal et al 2010      | Review              | India   | Meso               | Tobacco industry interference                             |
| Owusu-Dabo et al 2010 | Original research   | Ghana   | Macro, meso        | Tobacco industry interference, enforcement                |
| Patel et al 2009      | Original research   | Africa  | Macro              | Tobacco industry interference, enforcement                |
| Persai et al 2016     | Original research   | India   | Micro, meso, macro | awareness, intersectoral coordination, review system      |
| Robertson et al 2018  | Original research   | Uganda  | Macro              | Tobacco industry interference, enforcement                |
| Sankaran et al 2015   | Original research   | India   | Macro              | Tobacco industry interference                             |

|                         |                   |               |                    |                                                           |
|-------------------------|-------------------|---------------|--------------------|-----------------------------------------------------------|
| Sanni et al 2018        | Original research | Africa        | Macro              | Tobacco industry interference, intersectoral coordination |
| Sarrafadegan et al 2016 | Original research | Iran          | Meso               | Awareness, intersectoral coordination                     |
| Sebrie et al 2007       | Original research | Latin America | Macro              | Tobacco industry interference                             |
| Sharma et al 2017       | Brief report      | India         | Micro, meso, macro | awareness, intersectoral coordination                     |
| Shelley et al 2019      | Original research | Global        | Macro              | awareness                                                 |
| Singh A et al 2020      | Review            | Ghana         | Meso, micro        | Awareness, enforcement                                    |
| Stillman et al 2014     | Original research | Vietnam       | Macro              | awareness, intersectoral coordination, review system      |
| VanDevanter et al 2017  | Original research | Vietnam       | Macro              | intersectoral coordination                                |
| Wisdom et al 2018       | Original research | Africa        | Macro              | intersectoral coordination                                |
